# Supplementary material for: Chalcogen-substituted PCBM derivatives as ternary components in PM6:Y6 solar cells
Source: Royal Society of Chemistry journal article supplement (doi:10.1039/d1ma00925g), 2021-11-15
Supplement: d1ma00925g1.pdf [file d1ma00925g1.pdf]

## *Supplementary Information*

### **Chalcogen-substituted PCBM derivatives as ternary component in PM6:Y6 solar cells.**

José G. Sánchez,<sup>aΨ</sup> Andrea Cabrera-Espinoza,<sup>bΨ</sup> Eugenia Martínez-Ferrero,<sup>a</sup> Juan Luis Delgado<sup>\*bc</sup> and Emilio Palomares<sup>\*ad</sup>

<sup>a</sup>Institute of Chemical Research of Catalonia-The Barcelona Institute of Science and Technology (ICIQBIST), Avda. Països Catalans, 16, Tarragona, E-43007, Spain. <sup>b</sup>POLYMAT,

University of the Basque Country UPV/EHU, Avenida de Tolosa 72, Donostia, San Sebastián 20018, Spain. <sup>c</sup>Ikerbasque, Basque Foundation for Science, Bilbao 48013, Spain

<sup>d</sup>ICREA, Passeig Lluís Companys 23, Barcelona, E08010, Spain

<sup>Ψ</sup>Contributed equally to this work.

Corresponding authors

Emilio Palomares: [epalomares@icq.es](mailto:epalomares@icq.es)

Juan Luis Delgado: [juanluis.delgado@polymat.eu](mailto:juanluis.delgado@polymat.eu)

## Synthetic procedures and compound characterization

### 1. Reagents, Solvents, and Other Materials

Chemicals and reagents for synthesis were purchased from commercial suppliers and used as received. Air-sensitive reactions were carried out under argon atmosphere. Anhydrous solvents were dried using a SPS purification system. Chromatography was performed using silica gel (40-60 $\mu$ , Acros Organics). Analytical thin layer chromatography (TLC) was performed using aluminum coated Macherey Nagel™ Standard SIL G Silica Layers on Alugram™ Aluminum Sheets UV254.

### 2. Characterization

**Nuclear magnetic resonance spectroscopy (NMR).** All the NMR spectra were recorded on a Bruker Advance 300 ( $^1\text{H}$ : 300 MHz;  $^{13}\text{C}$ : 75 MHz) spectrometer at 298 K and referenced to deuterated solvent (e.g.,  $\text{CHCl}_3$ - $d$  corrected to 7.26 and 77.16 ppm;  $\text{DCM}$ - $d_2$  to 5.32 and 54.00 ppm;  $\text{DMSO}$ - $d_6$  to 2.50 and 39.52 ppm for  $^1\text{H}$  and  $^{13}\text{C}$  NMR spectra, respectively). Chemical shifts ( $\delta$ ) are reported in ppm. Multiplicities are denoted as follows: s (singlet), d (doublet), t (triplet), q (quartet), dd (doublet of doublets), m (multiplet), br s (broad singlet), br m (broad multiplet). The coupling constants  $J$  are given in Hz.

**Fourier-transform infrared spectroscopy (FT-IR).** The FT-IR spectra were recorded on pure samples using a Bruker ALPHA ATR-IR spectrometer.

**MALDI-TOF measurements.** High-Resolution Matrix-Assisted Laser Desorption Ionization, coupled to a Time-Of-Flight (TOF) experiments (MALDI-TOF) were performed on a Bruker Ultraflex III. All data were acquired at a maximum accelerating potential of 20 kV in the linear negative ion mode. DCTB was used as a matrix and AgTFA was added as the cationic ionization agent.

**Differential Scanning Calorimetry (DSC).** DSC measurements were done in a Mettler Toledo 822e differential scanning calorimeter under nitrogen atmosphere following a ramp from 30 to 300  $^\circ\text{C}$  at a heating rate of 10 $^\circ\text{C}/\text{min}$ .

### 3. Electrochemical Measurements.

Electrochemical measurements were carried out on a Princeton Applied Research Parstat 2273 in a three-electrode electrochemical cell, consisting of a glassy carbon disk working electrode ( $\varnothing = 3$  mm, CH Instruments, CHI104), a platinum wire counter electrode ( $\varnothing = 0.5$  mm, CH Instruments, CHI115), and a silver wire pseudoreference electrode ( $\varnothing = 0.5$  mm, CH Instruments, CHI112). All experiments were run at a scan rate of 100 mV/s in degassed *o*-DCB:AcN (4:1) electrolyte containing 1 mM active species and 0.1 M Bu<sub>4</sub>NPF<sub>6</sub> with added 0.5 mM ferrocene as an internal voltage reference ( $\text{Fc}/\text{Fc}^+ = 0.00$  V).

### 4. Synthesis of tosylhydrazones TsHX

The synthesis of TsHX is represented in Scheme S1. The details and the spectroscopy data are described below. Selenophene-2-carboxaldehyde **1a** was prepared according to a literature procedure based on the Vilsmeier-Haack reaction<sup>1</sup> and thiophene-2-carboxaldehyde **1b** and furan-2-carboxaldehyde **1c** were bought from Sigma Aldrich

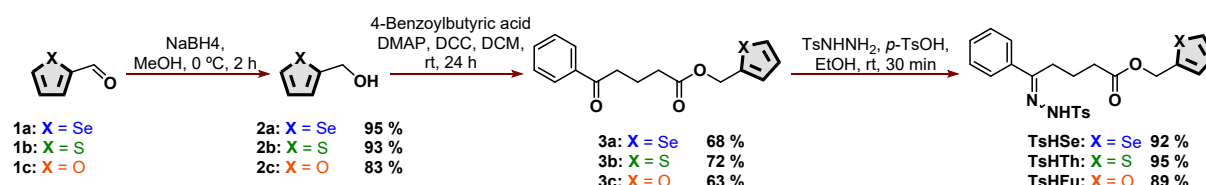

Scheme S1. Synthetic route for **4a-c** derivatives

**Selenophene-2-carbaldehyde (1a):**  $^1\text{H}$  NMR (300 MHz,  $\text{CHCl}_3$ - $d$ )  $\delta$  [ppm] = 9.81 (d,  $J = 1.1$  Hz, 1H), 8.49 (dt,  $J = 5.4$ , 1.1 Hz, 1H), 8.01 (dd,  $J = 3.9$ , 1.1 Hz, 1H), 7.47 (dd,  $J = 5.4$ , 3.9 Hz, 1H). The NMR data corresponded to those reported in the literature.<sup>1</sup>

**General procedure for the synthesis of alcohols 2a-c:** NaBH<sub>4</sub> (85.1 mg, 2.25 mmol) was added slowly portion wise for 20 min at 0  $^\circ\text{C}$  to each aldehyde **1a-c** (4.50 mmol) dissolved in methanol (15 mL). The reactions were

stirred for 1 h at 0 °C, then allowed to reach room temperature and stirred for 1 h more. Thereafter, HCl 2M was added until neutral pH and the mixtures were washed with NaHCO<sub>3</sub> saturated solution, brine, and water. The organic layers were dried over Na<sub>2</sub>SO<sub>4</sub>, filtered and concentrated under reduced pressure to give colorless liquids.

**Selenophen-2-ylmethanol (2a):** (692.4 mg, 4.28 mmol, yield 95 %). <sup>1</sup>H NMR (300 MHz, CHCl<sub>3</sub>-*d*) δ [ppm] = 7.96 (dd, *J* = 5.5, 1.1 Hz, 1H), 7.19 (dd, *J* = 5.5, 3.7 Hz, 1H), 7.15 – 7.12 (m, 1H), 4.81 (d, *J* = 1.1 Hz, 2H), 2.61 (s, 1H). <sup>13</sup>C NMR (75 MHz, CHCl<sub>3</sub>-*d*) δ [ppm] = 151.6, 130.8, 129.2, 127.0, 62.1.

**Thiophen-2-ylmethanol (2b):** (477.8 mg, 4.19 mmol, yield 93 %). <sup>1</sup>H NMR (300 MHz, CHCl<sub>3</sub>-*d*) δ [ppm] = 7.30 (dd, *J* = 4.7, 1.6 Hz, 1H), 7.02 – 6.98 (m, 2H), 4.80 (s, 2H), 2.55 (s, 1H). The NMR data corresponded to those reported in the literature.<sup>2</sup>

**Furan-2-ylmethanol (2c):** (366.4 mg, 3.74 mmol, yield 83 %). <sup>1</sup>H NMR (300 MHz, CHCl<sub>3</sub>-*d*) δ [ppm] = 7.42 (dd, *J* = 1.8, 0.8 Hz, 1H), 6.39 – 6.34 (m, 1H), 6.34 – 6.29 (m, 1H), 4.63 (s, 2H), 1.92 (s, 1H). The NMR data corresponded to those reported in the literature.<sup>2</sup>

**General procedure for the synthesis of ketoesters 3a-c:** 4-benzoylbutyric acid (576.6 mg, 3.00 mmol), DMAP (549.8 mg, 4.50 mmol) and the corresponding alcohol **2a-c** (3.30 mmol) were dissolved in degassed dry DCM (3 mL). The mixtures were cooled and DCC (1238.0 mg, 6.00 mmol) dissolved in dry DCM (3 mL) was added dropwise. The reactions were stirred overnight at room temperature. Precipitates were filtered off and the filtrates were concentrated under reduced pressure. The residues were purified by column chromatography, eluting with DCM to afford **3a-b** as pale-yellow oils.

**Selenophen-2-ylmethyl 5-oxo-5-phenylpentanoate (3a):** (684.0 mg, 2.04 mmol, yield 68 %). <sup>1</sup>H NMR (300 MHz, CHCl<sub>3</sub>-*d*) δ [ppm] = 8.03 (dd, *J* = 5.6, 1.2 Hz, 1H), 7.97 – 7.94 (m, 2H), 7.62 – 7.55 (m, 1H), 7.53 – 7.42 (m, 2H), 7.30 – 7.25 (m, 1H), 7.22 (dd, *J* = 5.6, 3.7 Hz, 1H), 5.35 (s, 2H), 3.06 (t, *J* = 7.1 Hz, 2H), 2.51 (t, *J* = 7.1 Hz, 2H), 2.12 (p, *J* = 7.1 Hz, 2H). <sup>13</sup>C NMR (75 MHz, CHCl<sub>3</sub>-*d*) δ [ppm] = 199.4, 173.1, 144.6, 136.9, 133.2, 132.7, 130.3, 129.0, 128.7, 128.1, 62.9, 37.4, 33.4, 19.4.

**Thiophen-2-ylmethyl 5-oxo-5-phenylpentanoate (3b):** (622.9 mg, 2.16 mmol, yield 72 %). <sup>1</sup>H NMR (300 MHz, CHCl<sub>3</sub>-*d*) δ [ppm] = 7.94 – 7.90 (m, 2H), 7.59 – 7.51 (m, 1H), 7.48 – 7.40 (m, 2H), 7.30 (dd, *J* = 5.1, 1.2 Hz, 1H), 7.11 – 7.06 (m, 1H), 6.97 (dd, *J* = 5.1, 3.5 Hz, 1H), 5.28 (s, 2H), 3.02 (t, *J* = 7.2 Hz, 2H), 2.47 (t, *J* = 7.1 Hz, 2H), 2.08 (p, *J* = 7.2 Hz, 2H). The NMR data corresponded to those reported in the literature.<sup>3</sup>

**Furan-2-ylmethyl 5-oxo-5-phenylpentanoate (3c):** (514.6 mg, 1.89 mmol, yield 63 %). <sup>1</sup>H NMR (300 MHz, CHCl<sub>3</sub>-*d*) δ [ppm] = 7.94 – 7.90 (m, 2H), 7.57 – 7.50 (m, 1H), 7.47 – 7.40 (m, 2H), 7.40 – 7.37 (m, 1H), 6.40 – 6.36 (m, 1H), 6.35 – 6.31 (m, 1H), 5.06 (s, 2H), 3.01 (t, *J* = 7.2 Hz, 2H), 2.45 (t, *J* = 7.2 Hz, 2H), 2.06 (t, *J* = 7.2 Hz, 2H). <sup>13</sup>C NMR (75 MHz, CHCl<sub>3</sub>-*d*) δ [ppm] = 199.4, 172.9, 149.5, 143.3, 136.9, 133.1, 128.6, 128.1, 110.7, 110.6, 58.0, 37.4, 35.0, 33.2.

#### General procedure for the synthesis of tosylhydrazones TsHX:

*p*-Toluenesulfonyl hydrazide (223.5 mg, 1.20 mmol) was added to a mixture of ketoester **3a-c** (1.00 mmol) with *p*-toluenesulfonic acid (12% in acetic acid, 28.7 mg, 0.02 mmol) in EtOH (2 mL). After 30 minutes stirring at room temperature, the solvent was removed under reduced pressure and the residues were crystallized from methanol to yield **TsHX** as white solids.

**Selenophen-2-ylmethyl 5-phenyl-5-(2-tosylhydrazineylidene)pentanoate (TsHSe):** (463.2 mg, 0.92 mmol, yield 92 %). <sup>1</sup>H NMR (300 MHz, DMSO-*d*<sub>6</sub>) δ [ppm] = 10.70 (s, 1H), 8.18 (dd, *J* = 5.5, 1.1 Hz, 1H), 7.79 (d, *J* = 8.2 Hz, 2H), 7.63 – 7.54 (m, 2H), 7.40 (d, *J* = 8.2 Hz, 2H), 7.38 – 7.29 (m, 4H), 7.21 (dd, *J* = 5.5, 3.7 Hz, 1H), 5.30 (s, 2H), 2.73 – 2.60 (m, 2H), 2.41 (t, *J* = 7.2 Hz, 2H), 2.36 (s, 3H), 1.67 – 1.51 (m, 2H). <sup>13</sup>C NMR (300 MHz, DMSO-*d*<sub>6</sub>) δ [ppm] = 172.4, 154.8, 144.6, 143.4, 136.2, 133.6, 130.5, 129.5, 129.4, 128.8, 128.5, 127.4, 126.0, 62.4, 33.0, 25.8, 21.1, 21.0.

**Thiophen-2-ylmethyl 5-phenyl-5-(2-tosylhydrazineylidene)pentanoate (TsHTh):** (433.8 mg, 0.95 mmol, yield 95 %). <sup>1</sup>H NMR (300 MHz, DMSO-*d*<sub>6</sub>) δ [ppm] = 10.70 (s, 1H), 7.79 (d, *J* = 8.2 Hz, 2H), 7.63 – 7.56 (m, 2H), 7.55 (dd, *J* = 5.1, 1.2 Hz, 1H), 7.40 (d, *J* = 8.2 Hz, 2H), 7.38 – 7.32 (m, 3H), 7.20 – 7.15 (m, 1H), 7.02 (dd, *J* = 5.1, 3.5 Hz, 1H),

5.27 (s, 2H), 2.71 – 2.62 (m, 2H), 2.40 (t,  $J = 7.3$  Hz, 2H), 2.36 (s, 3H), 1.66 – 1.53 (m, 2H). The NMR data corresponded to those reported in the literature.<sup>3</sup>

**Furan-2-ylmethyl 5-phenyl-5-(2-tosylhydrazineylidene)pentanoate (TsHFu):** (392.1 mg, 0.89 mmol, yield 89 %). <sup>1</sup>H NMR (300 MHz, DMSO-*d*<sub>6</sub>)  $\delta$  [ppm] = 10.69 (s, 1H), 7.79 (d,  $J = 8.4$  Hz, 2H), 7.71 – 7.62 (m, 1H), 7.62 – 7.57 (m, 2H), 7.40 (d,  $J = 8.4$  Hz, 2H), 7.38 – 7.31 (m, 3H), 6.54 – 6.51 (m, 1H), 6.47 – 6.45 (m, 1H), 5.06 (s, 2H), 2.71 – 2.62 (m, 2H), 2.45 – 2.37 (m, 2H), 2.36 (s, 3H), 1.62 – 1.53 (m, 2H). <sup>13</sup>C NMR (300 MHz, DMSO-*d*<sub>6</sub>)  $\delta$  [ppm] = 172.1, 156.6, 154.9, 149.3, 143.7, 143.4, 136.2, 129.5, 129.4, 128.5, 127.4, 126.0, 110.8, 110.7, 57.5, 33.3, 32.8, 25.7, 21.0.

## 5. Synthesis of PCBX derivatives:

Using the tosylhydrazones **TsHX**, **PCBX** derivatives were synthesized as it is illustrated in Scheme 1.

Under argon atmosphere, tosylhydrazone **TsHX** (0.30 mmol) was dissolved in degassed dry pyridine (5 mL), MeONa (24.3 mg, 0.45 mmol) was added and the mixture was stirred at room temperature. After 15 min, a solution of C<sub>60</sub> (324.0 mg, 0.45 mmol) dissolved in degassed dry *o*-DCB (30 mL) was added and stirred at 80 °C for 24 h and then at 180 °C for 24 h more to complete the conversion of the [5,6]-open isomers to the [6,6]-closed isomers. The mixture resulting was purified by chromatography on silica gel, eluting with CS<sub>2</sub> to remove the unreacted C<sub>60</sub> and toluene to collect the final products **PCBX** as a dark brown solids.

**[6,6]-phenyl C<sub>61</sub>-butyric acid 2-methylselenophene ester (PCBSe):** (131.0 mg, 0.13 mmol, yield 42 %). <sup>1</sup>H NMR (300 MHz, CS<sub>2</sub>:CHCl<sub>3</sub>-*d* 9:1)  $\delta$  [ppm] = 8.01 – 7.96 (m, 1H), 7.96 – 7.87 (m, 2H), 7.56 – 7.43 (m, 3H), 7.25 – 7.15 (m, 2H), 5.29 (s, 2H), 2.95 – 2.88 (m, 2H), 2.55 (t,  $J = 7.4$  Hz, 2H), 2.26 – 2.18 (m, 2H). <sup>13</sup>C NMR (75 MHz, CS<sub>2</sub>:CHCl<sub>3</sub>-*d* 9:1)  $\delta$  [ppm] = 168.6, 146.0, 145.1, 143.3, 142.6, 142.5, 142.4, 142.2, 142.1, 141.9, 141.6, 141.2, 140.6, 140.51, 140.47, 140.4, 139.7, 139.6, 139.5, 138.5, 138.3, 135.7, 135.2, 134.1, 130.4, 129.5, 128.1, 128.0, 127.6, 126.4, 126.3, 126.1, 125.8, 125.3, 125.1, 122.9, 60.1, 49.4, 31.3, 31.2, 20.1. FT-IR (ATR)  $\nu$  [cm<sup>-1</sup>] = 1732 (C=O), 1153 (C-O), 523 (C<sub>60</sub>, C-C). HR-MS (MALDI-TOF) =  $m/z$  calculated for [C<sub>76</sub>H<sub>16</sub>O<sub>2</sub>Se+Ag]<sup>+</sup>: 1146.94; found: 1146.955.

**[6,6]-phenyl C<sub>61</sub>-butyric acid 2-methylthiophene ester (PCBTh):** (137.0 mg, 0.14 mmol, yield 46 %). <sup>1</sup>H NMR (300 MHz, CS<sub>2</sub>:DCM-*d*<sub>2</sub> 9:1)  $\delta$  [ppm] = 7.96 – 7.92 (m, 2H), 7.58 – 7.49 (m, 3H), 7.31 (dd,  $J = 5.1, 1.2$  Hz, 1H), 7.10 – 7.04 (m, 1H), 6.98 (dd,  $J = 5.1, 3.5$  Hz, 1H), 5.25 (s, 2H), 2.97 – 2.88 (m, 3H), 2.54 (t,  $J = 7.3$  Hz, 3H), 2.26 – 2.15 (m, 3H). <sup>13</sup>C NMR (75 MHz, CS<sub>2</sub>:CHCl<sub>3</sub>-*d* 9:1)  $\delta$  [ppm] = 171.8, 149.2, 149.0, 148.7, 148.6, 148.5, 147.6, 147.3, 147.0, 145.9, 145.7, 145.5, 145.10, 145.07, 145.0, 144.8, 144.7, 144.6, 144.4, 144.0, 143.8, 143.7, 143.0, 142.91, 142.86, 142.13, 142.05, 142.00, 140.9, 132.0, 128.4, 128.2, 128.1, 126.82, 126.77, 79.6, 60.3, 51.7, 33.9, 33.6, 22.4. FT-IR (ATR)  $\nu$  [cm<sup>-1</sup>] = 1731 (C=O), 1150 (C-O), 523 (C<sub>60</sub>, C-C). HR-MS (MALDI-TOF) =  $m/z$  calculated for [C<sub>76</sub>H<sub>16</sub>O<sub>2</sub>S+Ag]<sup>+</sup>: 1098.99; found: 1098.930.

**[6,6]-phenyl C<sub>61</sub>-butyric acid 2-methylfuran ester (PCBFu):** (111.4 mg, 0.11 mmol, yield 38 %). <sup>1</sup>H NMR (300 MHz, CS<sub>2</sub>:DCM-*d*<sub>2</sub> 9:1)  $\delta$  [ppm] = 10.69 (s, 1H), 7.79 (d,  $J = 8.3$  Hz, 2H), 7.71 – 7.62 (m, 1H), 7.62 – 7.57 (m, 2H), 7.40 (d,  $J = 8.3$  Hz, 2H), 7.38 – 7.31 (m, 3H), 6.54 – 6.51 (m, 1H), 6.47 – 6.45 (m, 1H), 5.06 (s, 2H), 2.71 – 2.62 (m, 2H), 2.43 – 2.34 (m, 5H), 1.62 – 1.53 (m, 2H). <sup>13</sup>C NMR (75 MHz, CS<sub>2</sub>:CHCl<sub>3</sub>-*d* 9:1)  $\delta$  [ppm] = 171.3, 148.37, 147.43, 145.6, 145.1, 145.0, 144.9, 144.8, 144.6, 144.5, 144.3, 143.9, 143.6, 142.9, 142.81, 142.76, 142.7, 142.0, 141.95, 141.88, 140.9, 140.65, 140.60, 137.9, 137.5, 136.4, 131.9, 128.3, 128.2, 128.1, 110.6, 110.5, 79.5, 57.7, 51.6, 33.6, 33.5, 22.3. FT-IR (ATR)  $\nu$  [cm<sup>-1</sup>] = 1731 (C=O), 1151 (C-O), 523 (C<sub>60</sub>, C-C). HR-MS (MALDI-TOF) =  $m/z$  calculated for [C<sub>76</sub>H<sub>16</sub>O<sub>3</sub>+Ag]<sup>+</sup>: 1083.02; found: 1083.073.

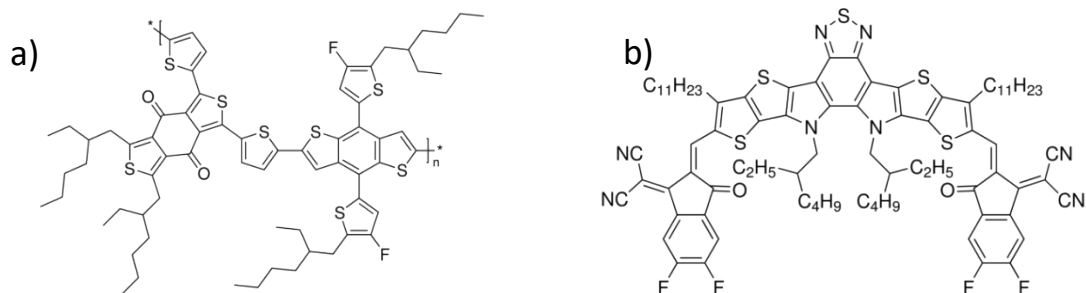

**Fig. S1** Chemical structure of (a) PM6 and (b) Y6

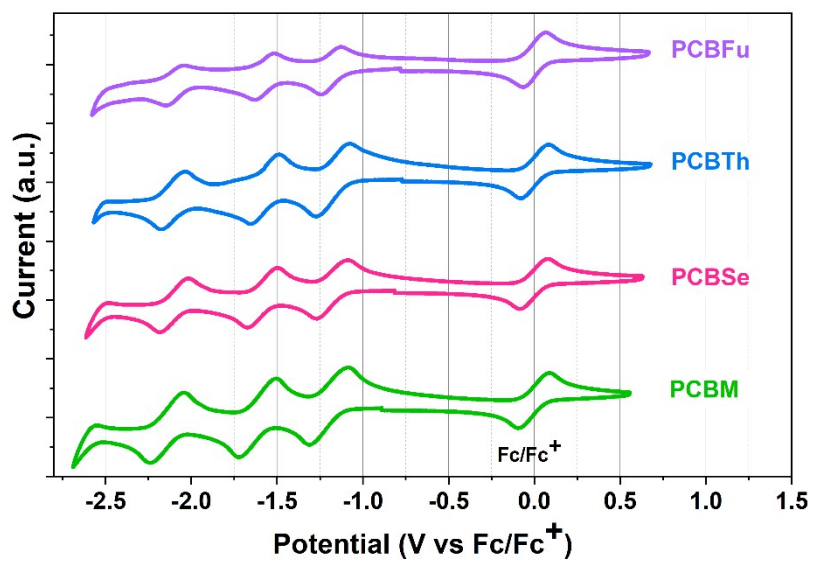

**Fig. S2** Cyclic voltammetry measurements for PCBM-derivatives.

### NMR Spectra

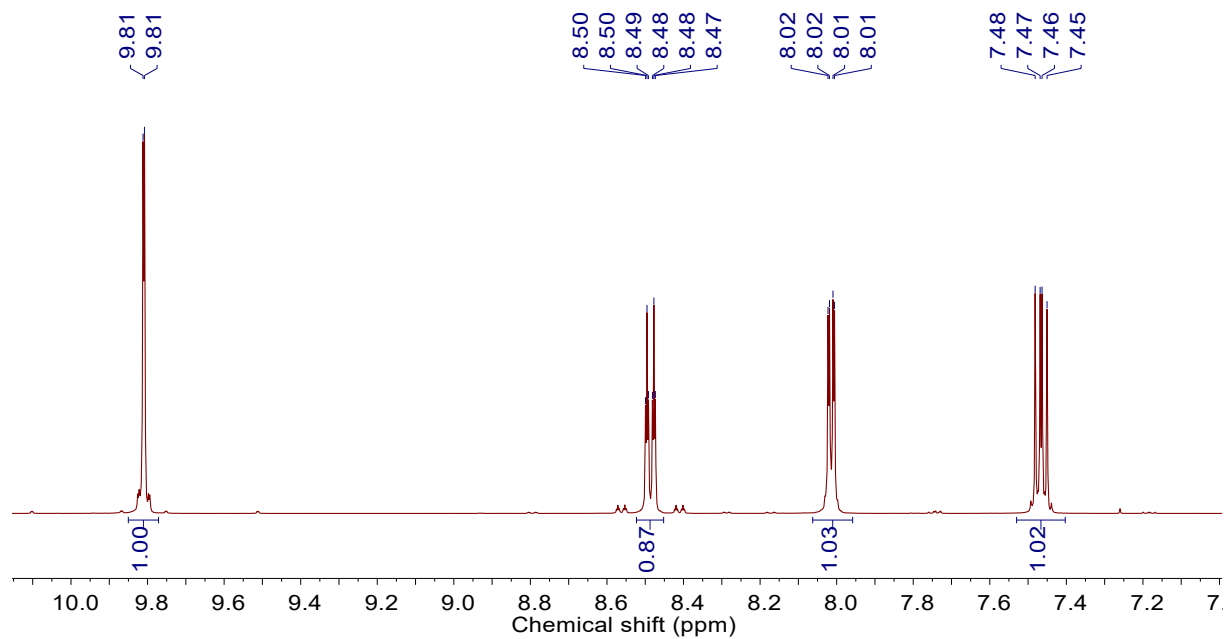

Fig. S3  $^1\text{H}$  NMR spectrum of **1a** in  $\text{CHCl}_3\text{-}d$  at 300 Hz

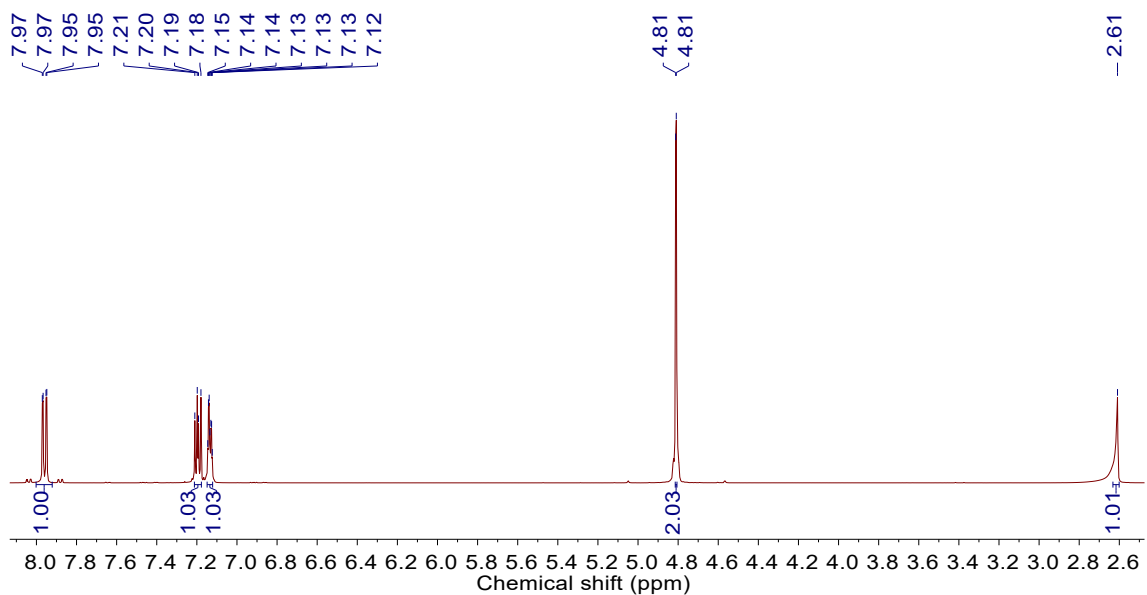

Fig. S4.  $^1\text{H}$  NMR spectrum of **2a** in  $\text{CHCl}_3\text{-}d$  at 300 Hz

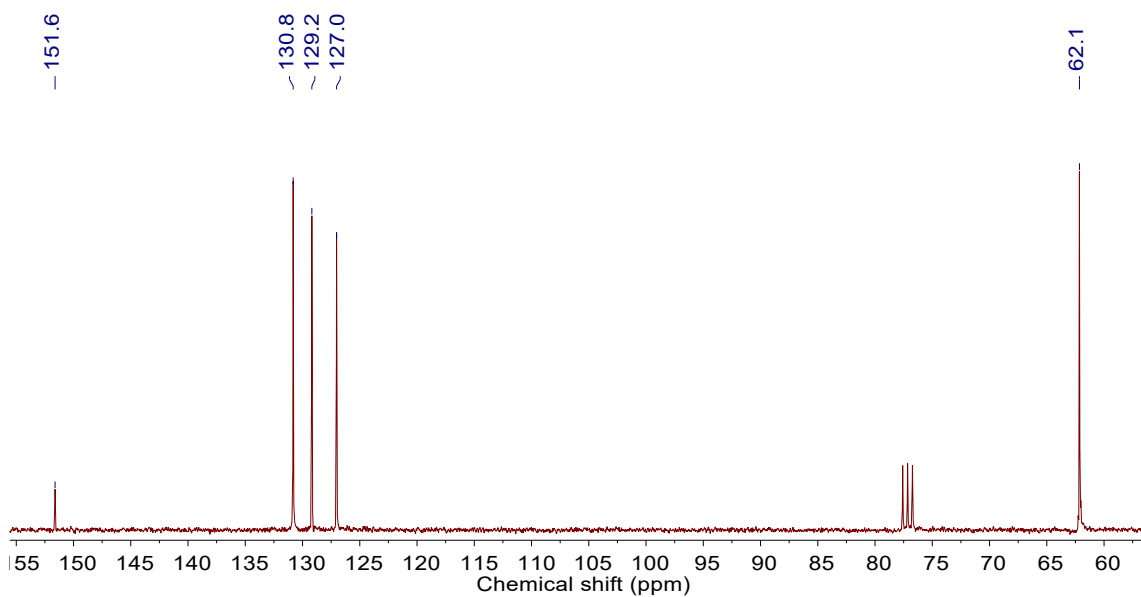

Fig. S5  $^{13}\text{C}$  NMR spectrum of **2a** in  $\text{CHCl}_3\text{-}d$  at 75 Hz

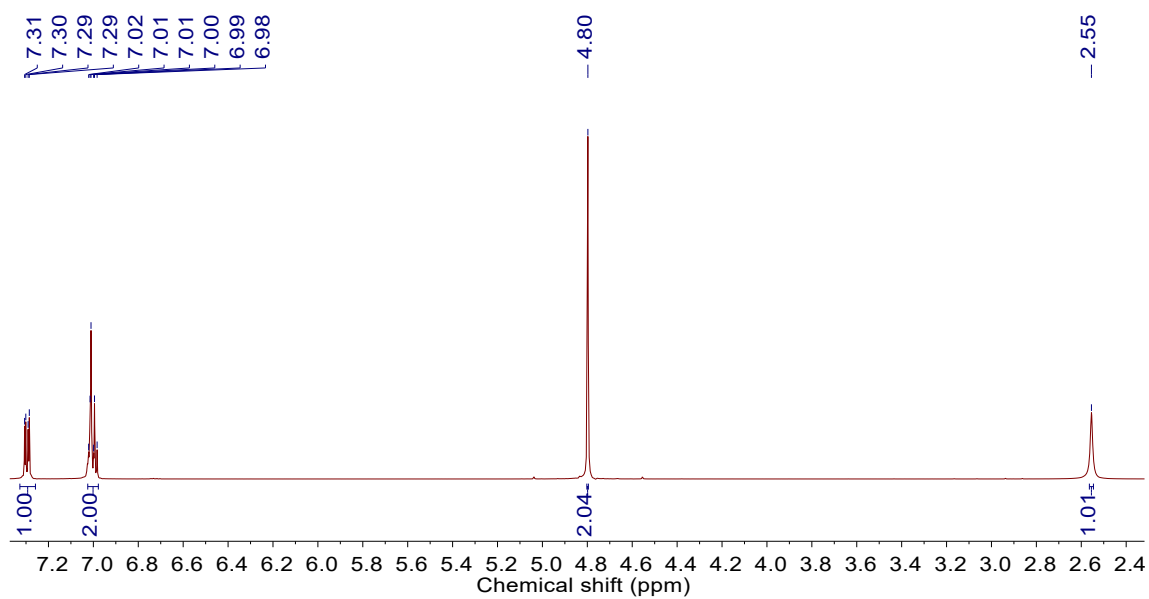

Fig. S6  $^1\text{H}$  NMR spectrum of **2b** in  $\text{CHCl}_3\text{-}d$  at 300 Hz

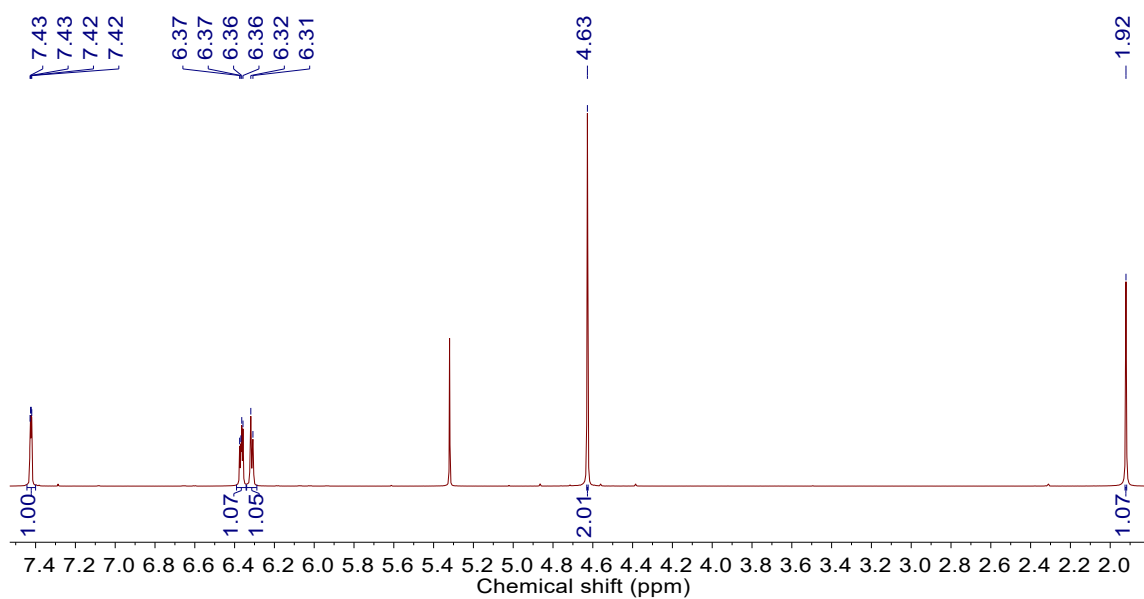

Fig. S7  $^1\text{H}$  NMR spectrum of **2c** in  $\text{DCM-d}_2$  at 300 Hz

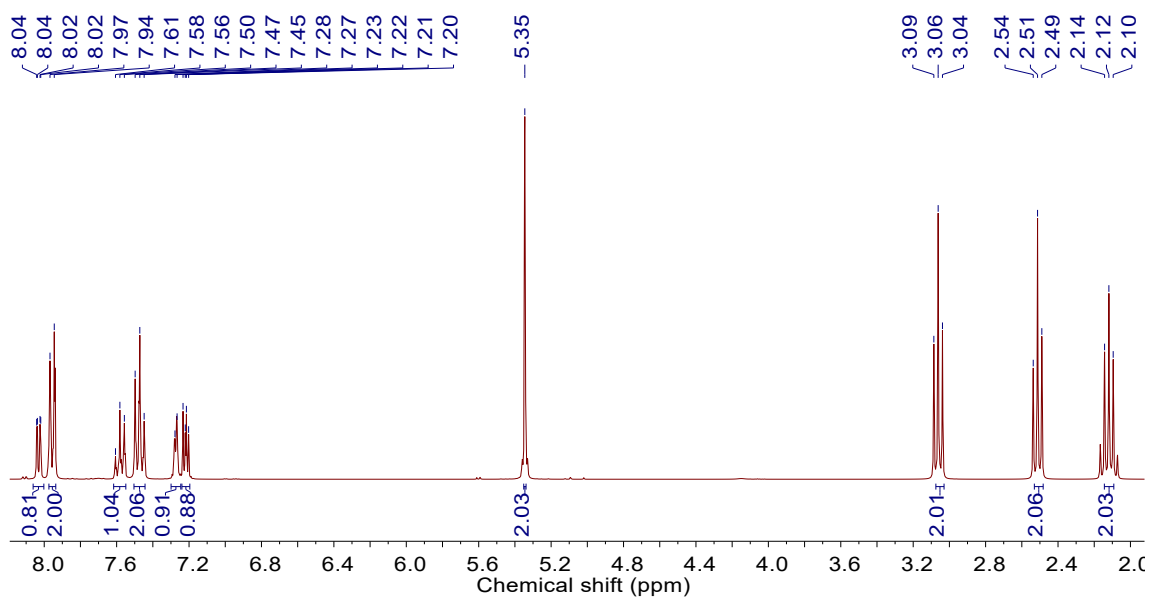

Fig. S8  $^1\text{H}$  NMR spectrum of **3a** in  $\text{CHCl}_3-d$  at 300 Hz



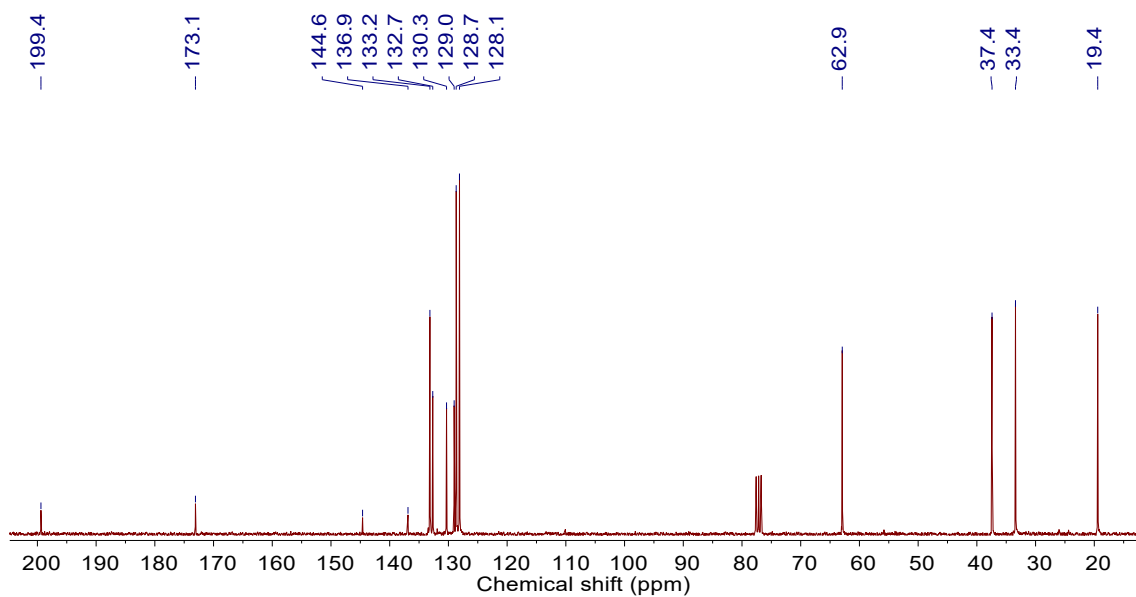

Fig. S9  $^{13}\text{C}$  NMR spectrum of **3a** in  $\text{CHCl}_3\text{-}d$  at 75 Hz

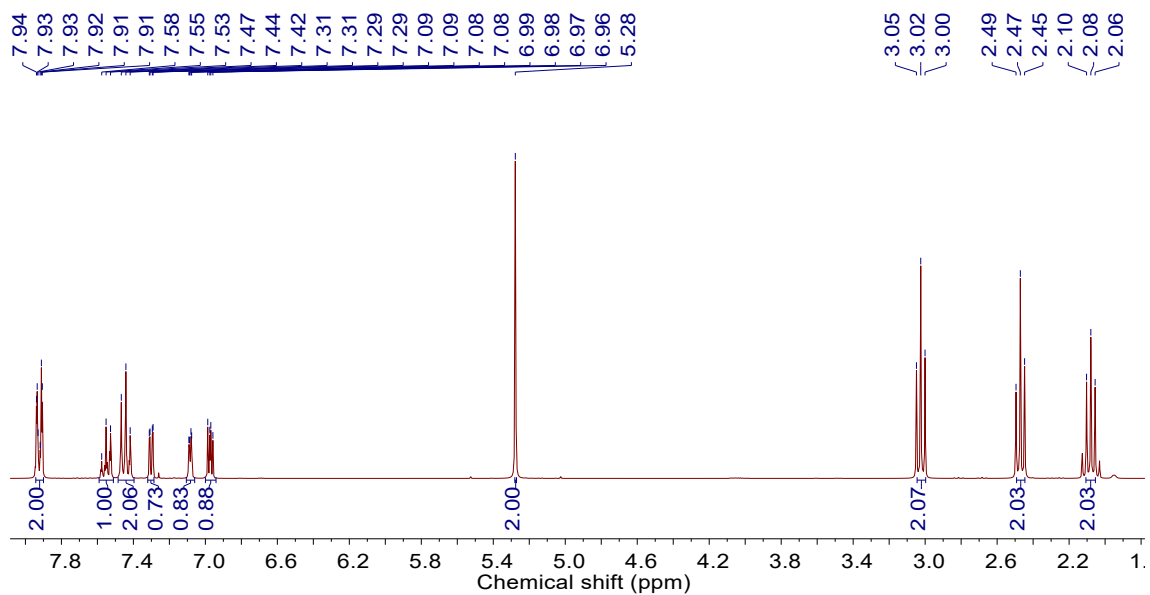

Fig. S10  $^1\text{H}$  NMR spectrum of **3b** in  $\text{CHCl}_3\text{-}d$  at 300 Hz

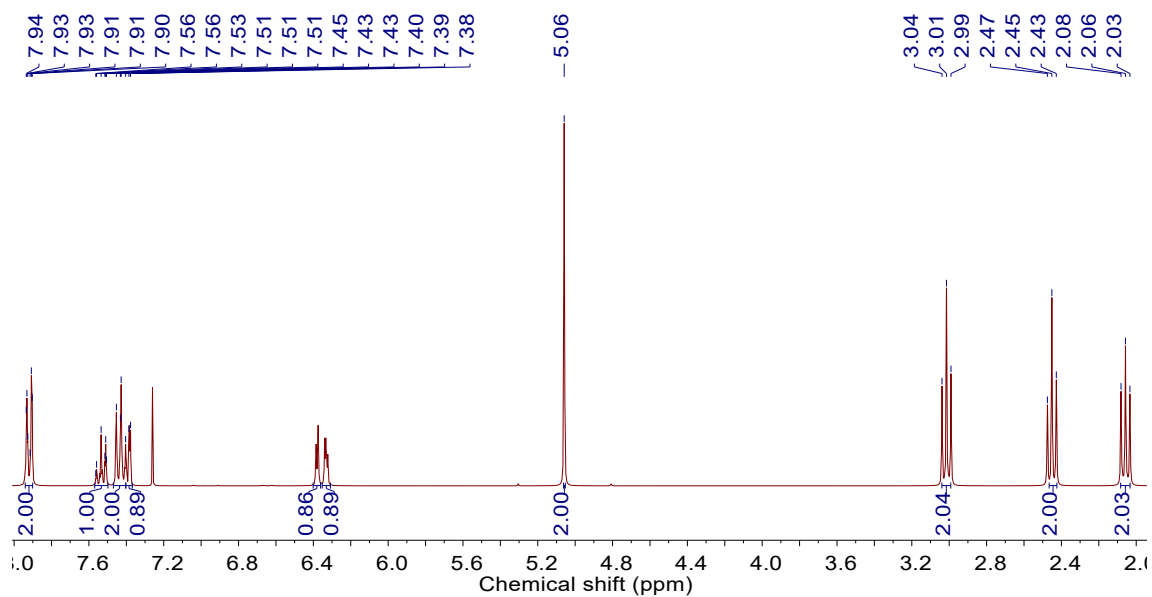

Fig. S11  $^1\text{H}$  NMR spectrum of **3c** in  $\text{CHCl}_3\text{-}d$  at 300 Hz

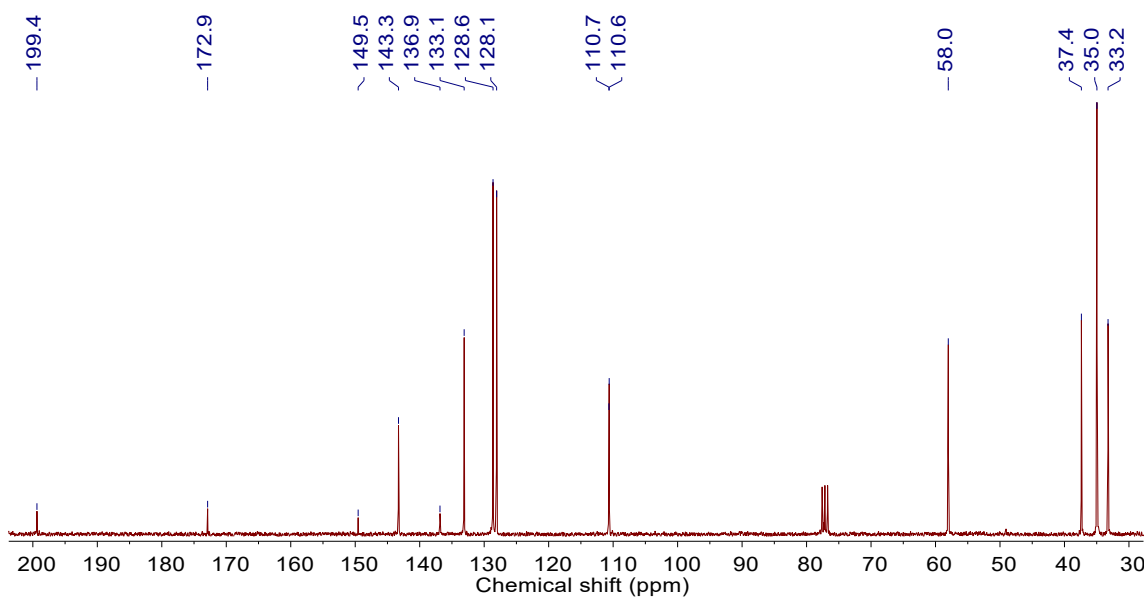

Fig. S12  $^{13}\text{C}$  NMR spectrum of **3c** in  $\text{CHCl}_3\text{-}d$  at 300 Hz

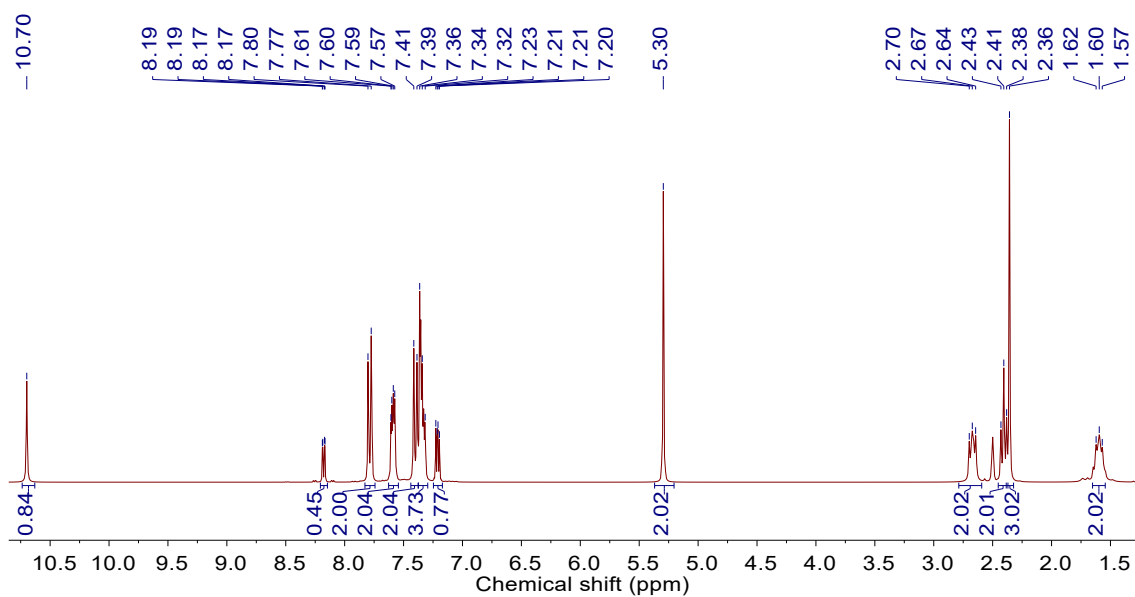

Fig. S13  $^1\text{H}$  NMR spectrum of TsHSe in  $\text{DMSO-}d_6$  at 300 Hz

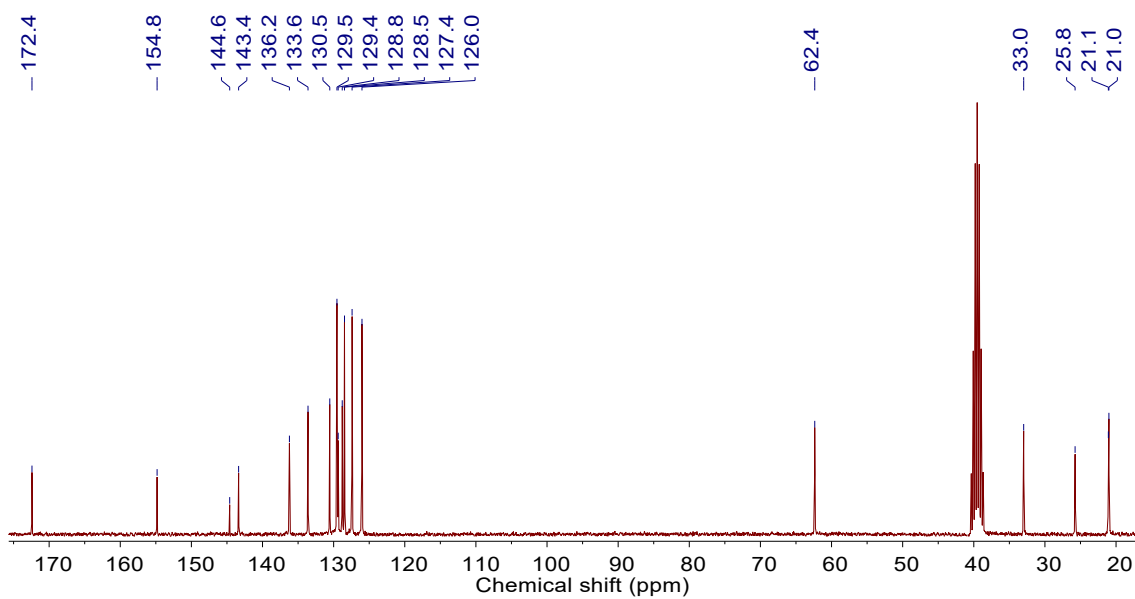

Fig. S14  $^{13}\text{C}$  NMR spectrum of TsHSe in  $\text{DMSO-}d_6$  at 75 Hz

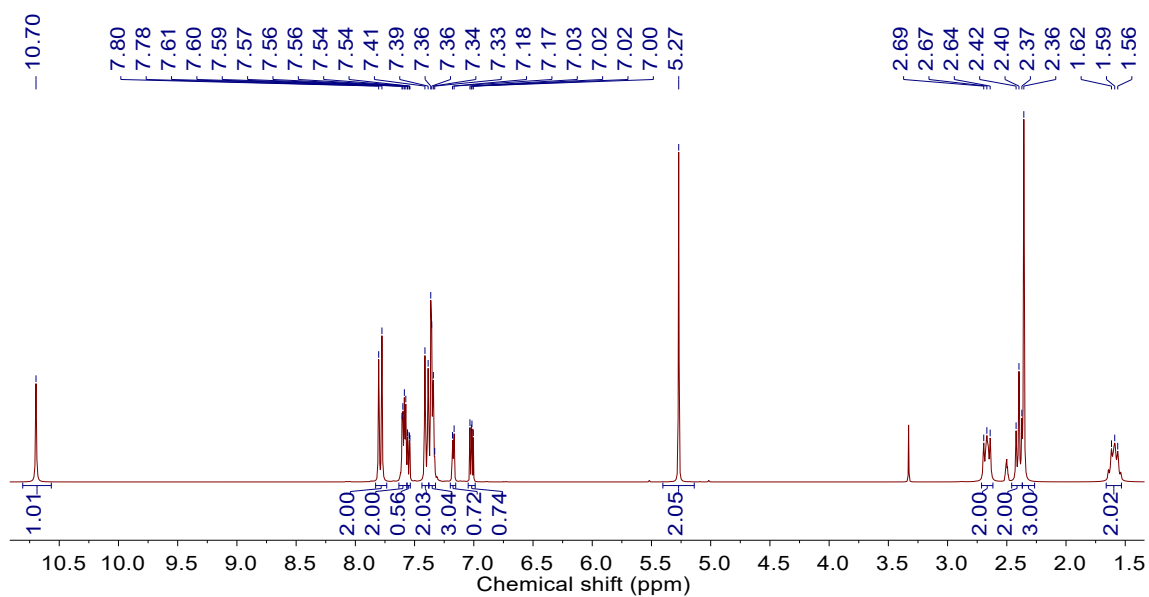

Fig. S15  $^1\text{H}$  NMR spectrum of TsHTh in  $\text{DMSO-}d_6$  at 300 Hz

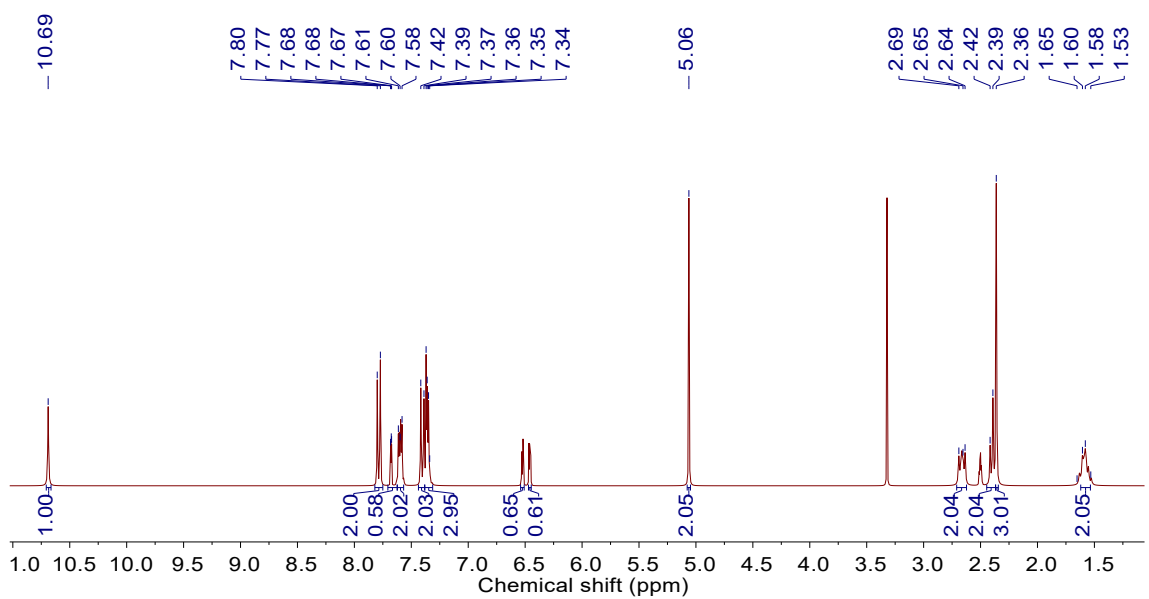

Fig.S16  $^1\text{H}$  NMR spectrum of TsHFu in  $\text{DMSO-}d_6$  at 300 Hz

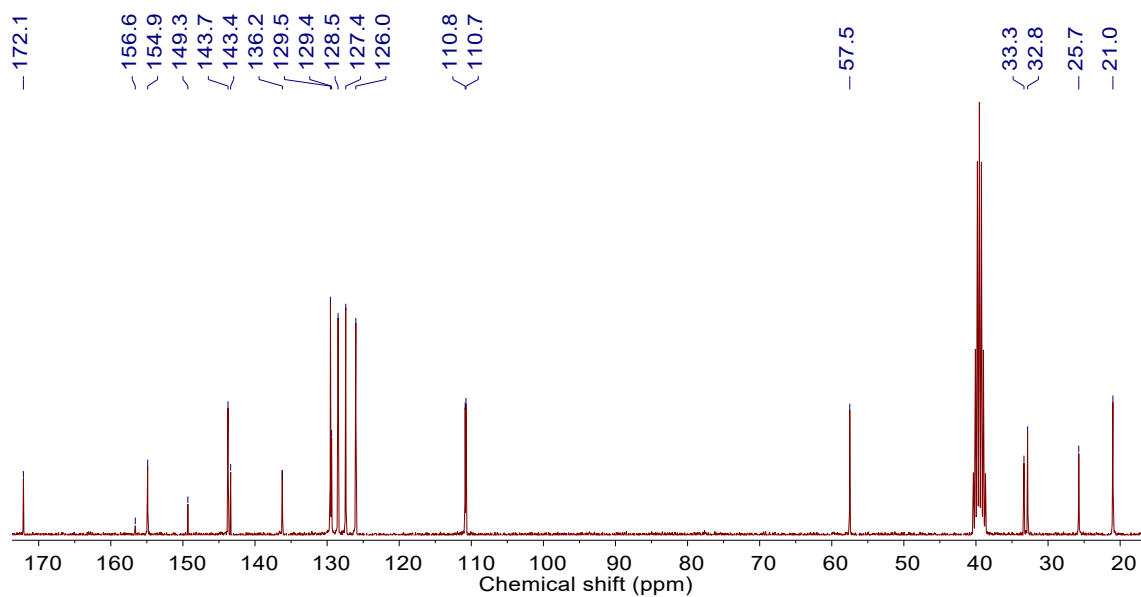

Fig. S17  $^{13}\text{C}$  NMR spectrum of TsHFu in  $\text{DMSO-}d_6$  at 300 Hz

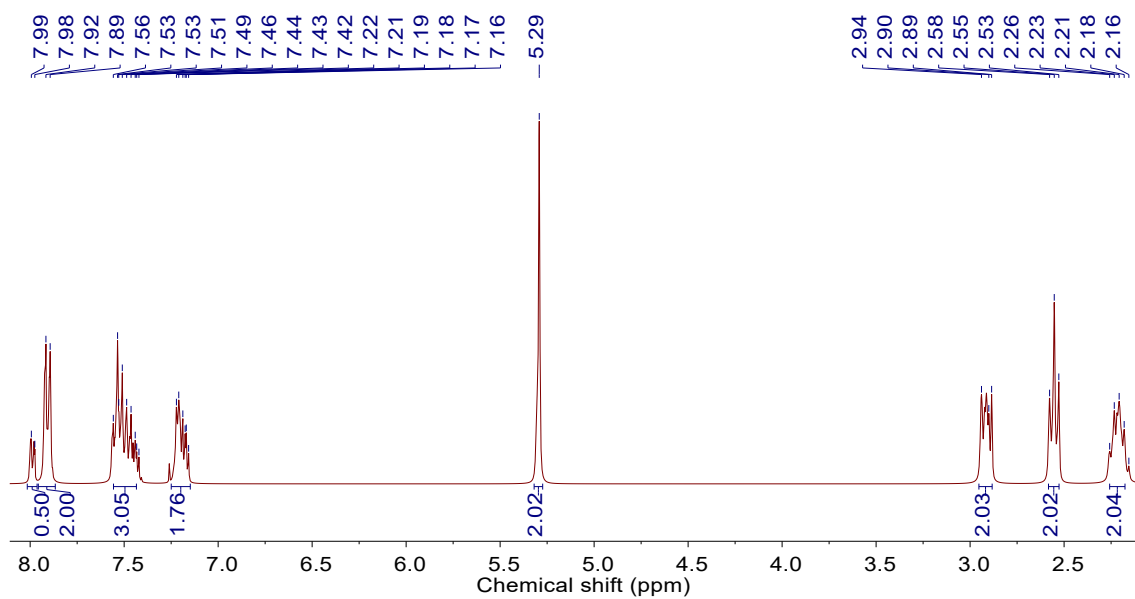

Fig. S18  $^1\text{H}$  NMR spectrum of PCBSe in  $\text{CS}_2:\text{CHCl}_3-d$  (9:1) at 300 Hz

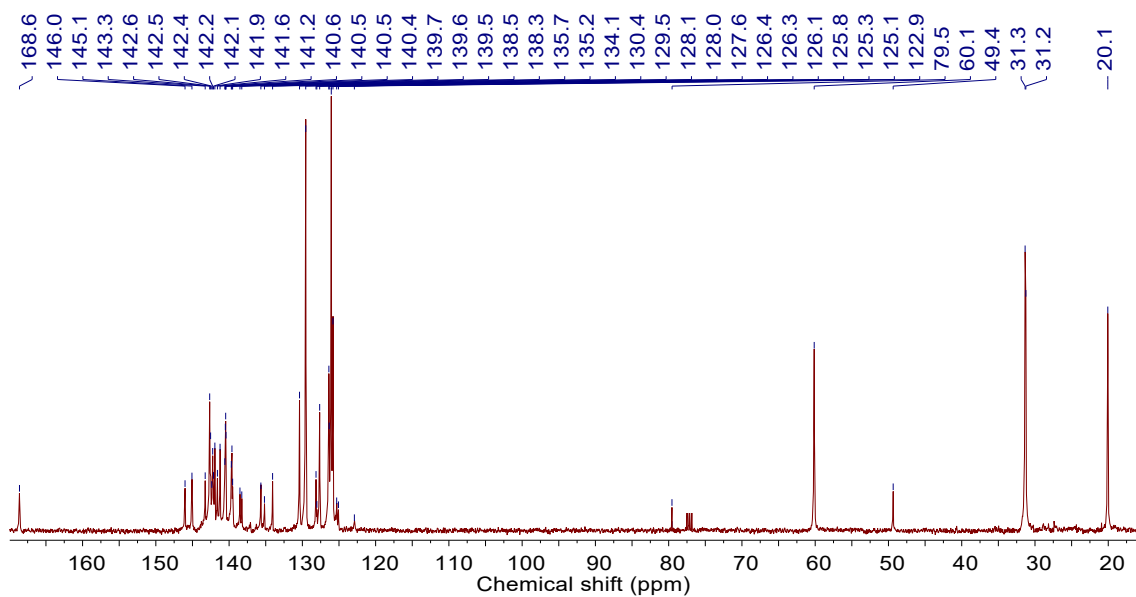

Fig. S19  $^{13}\text{C}$  NMR spectrum of PCBSe in  $\text{CS}_2:\text{CHCl}_3\text{-}d$  (9:1) at 75 Hz

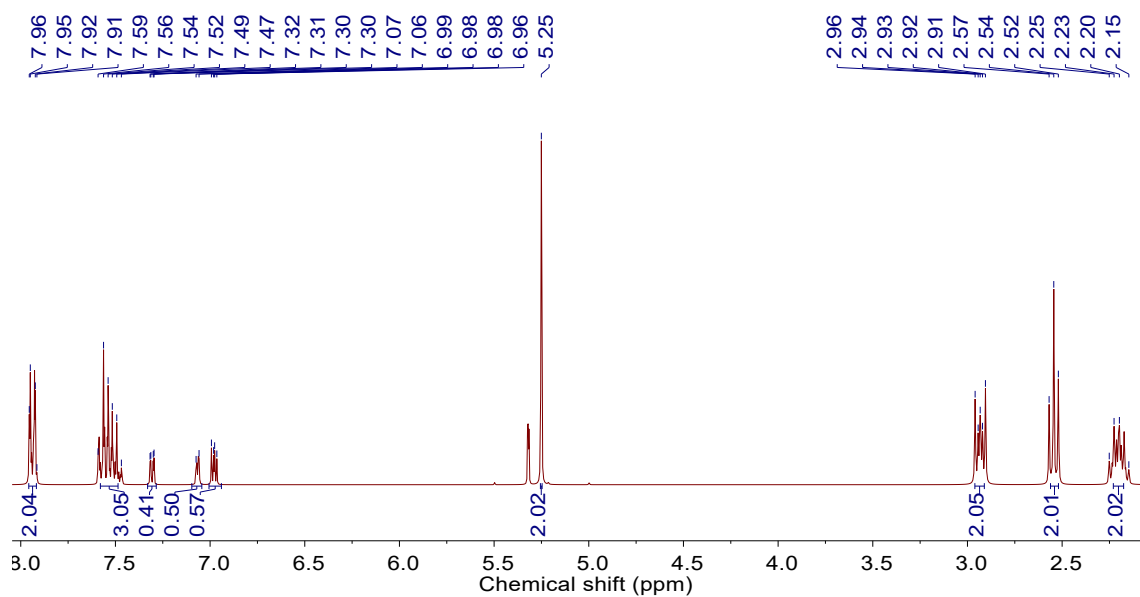

Fig. S20  $^1\text{H}$  NMR spectrum of PCBTh in  $\text{CS}_2:\text{DCM-}d_2$  (9:1) at 300 Hz

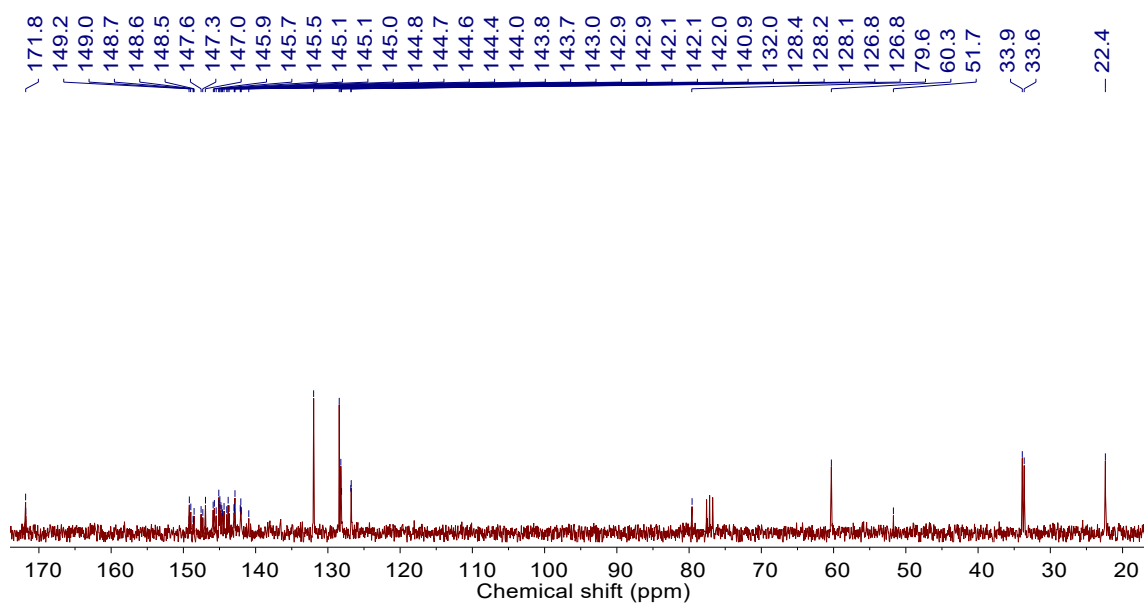

Fig. S21  $^{13}\text{C}$  NMR spectrum of PCBTh in  $\text{CS}_2:\text{CHCl}_3\text{-}d$  (9:1) at 75 Hz

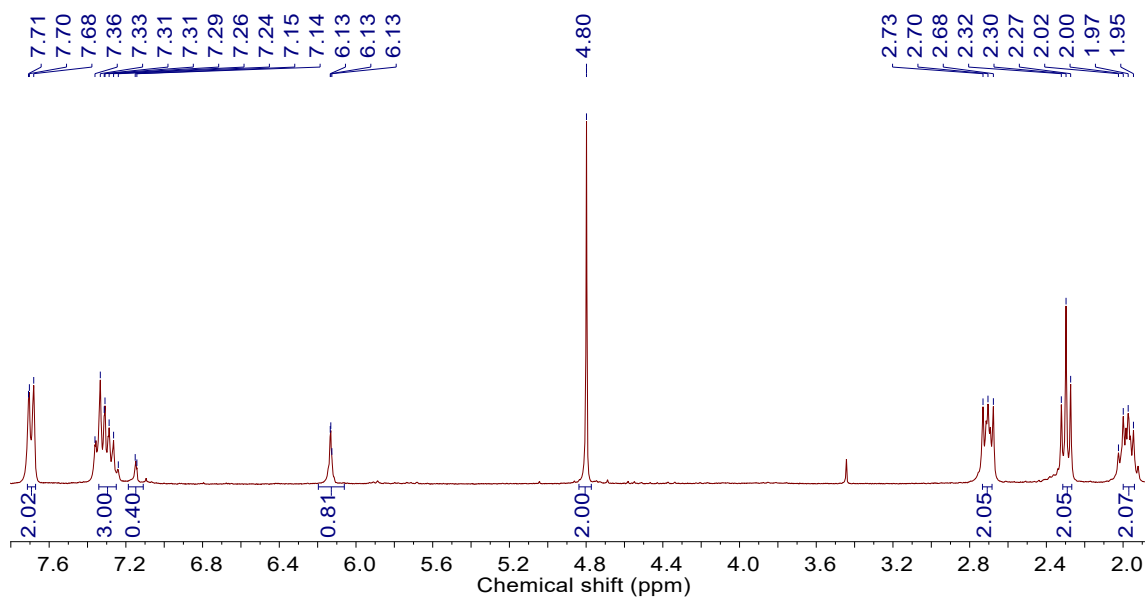

Fig. S22  $^1\text{H}$  NMR spectrum of PCBFu in  $\text{CS}_2:\text{CHCl}_3\text{-}d$  (9:1) at 300 Hz

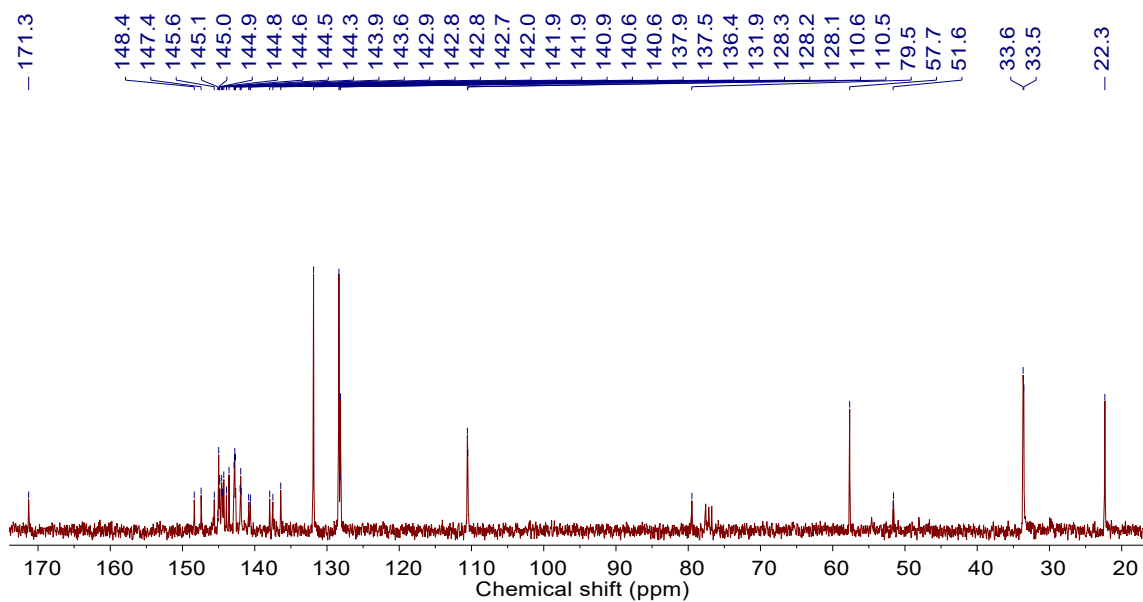

Fig. S23  $^{13}\text{C}$  NMR spectrum of PCBFu in  $\text{CS}_2:\text{CHCl}_3\text{-}d$  (9:1) at 75 Hz

#### FT-IR spectra

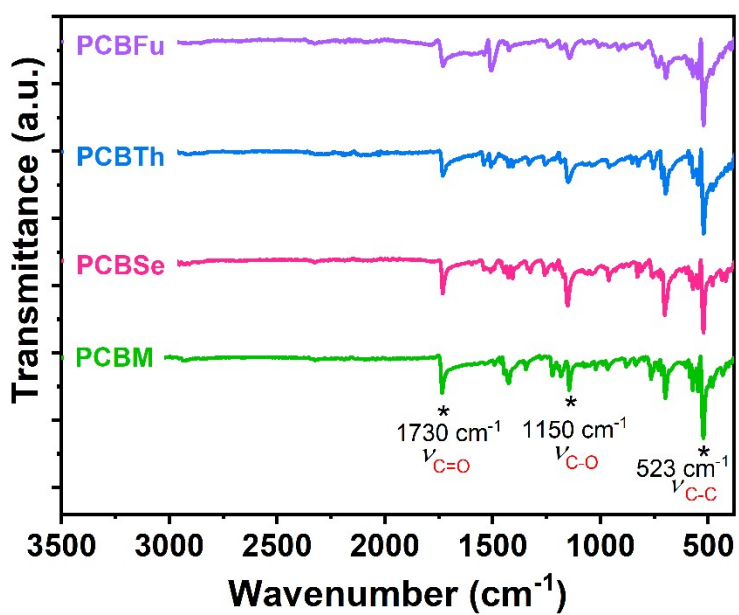

Fig. S24 FT-IR spectra of PCBM, PCBSe, PCBTh and PCBFu.



MALDI-TOF mass spectra

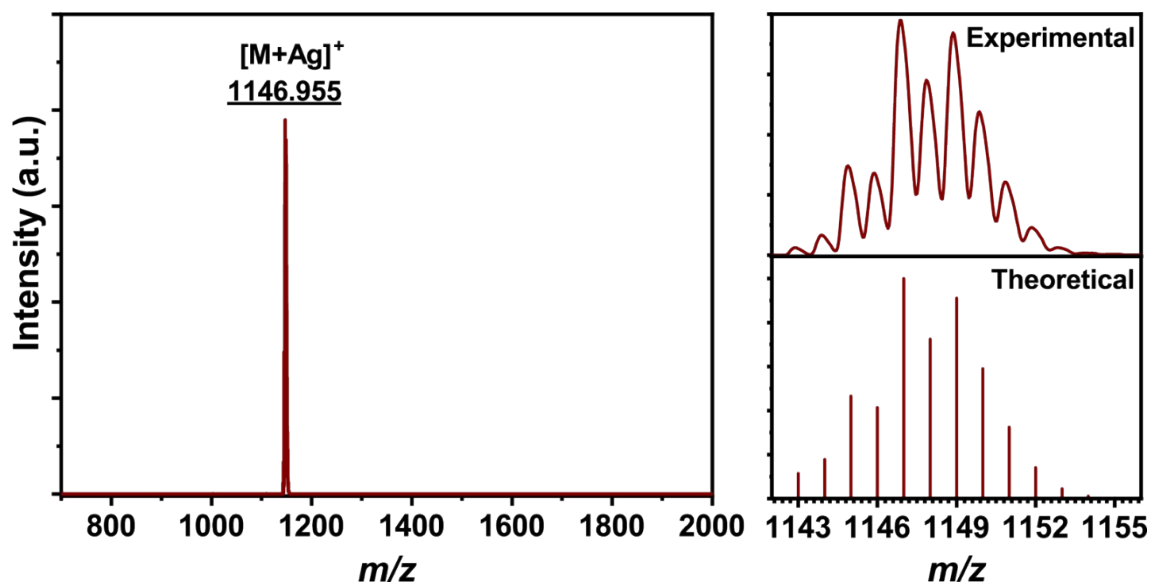

Fig. S25 MALDI-TOF mass spectrum of PCBSe

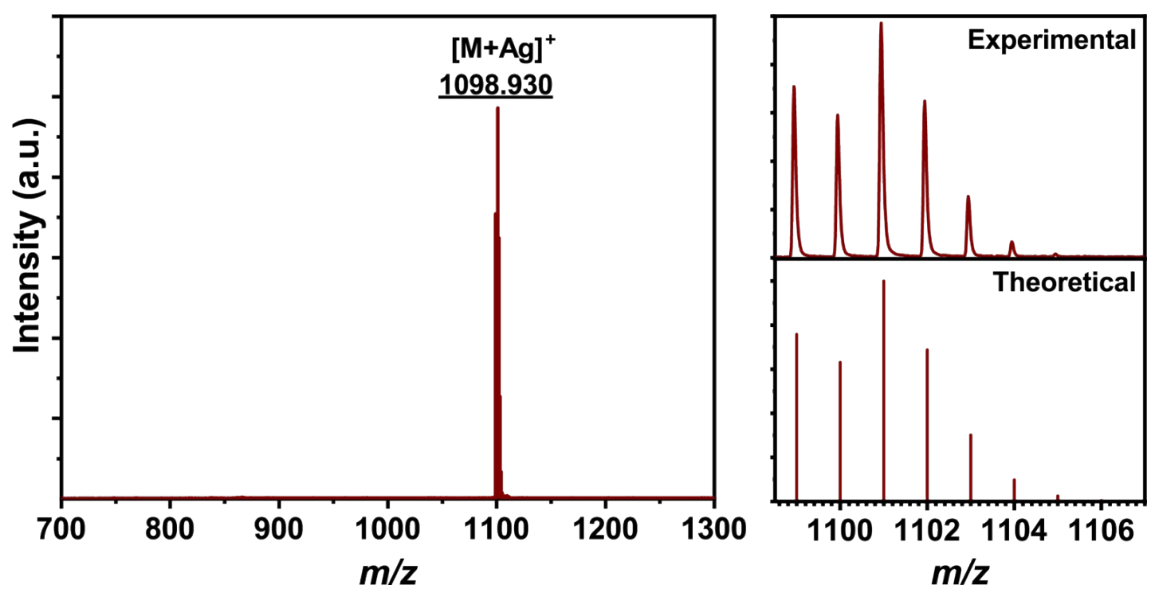

Fig. S26 MALDI-TOF mass spectrum of PCBTh

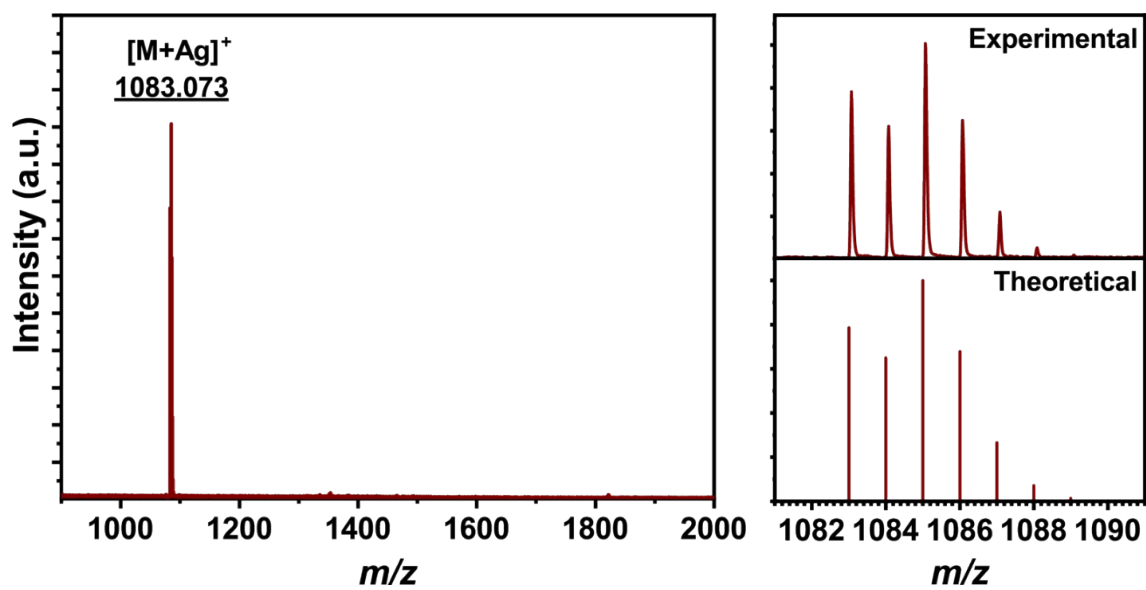

Fig. S27 MALDI-TOF mass spectrum of PCBFu.

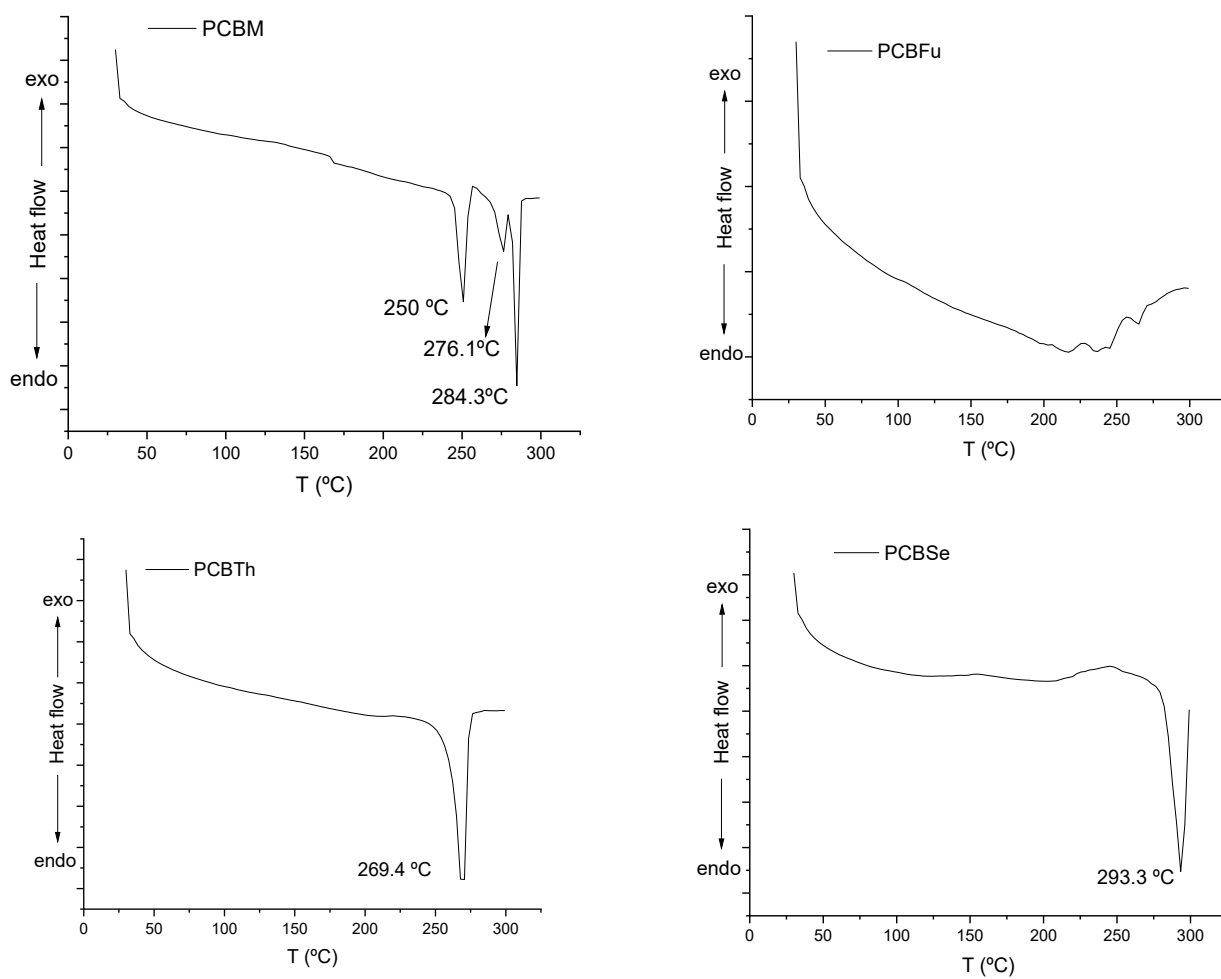

Fig. S28 DSC thermograms of the PCBM, PCBFu, PCBTh and PCBSe molecules.

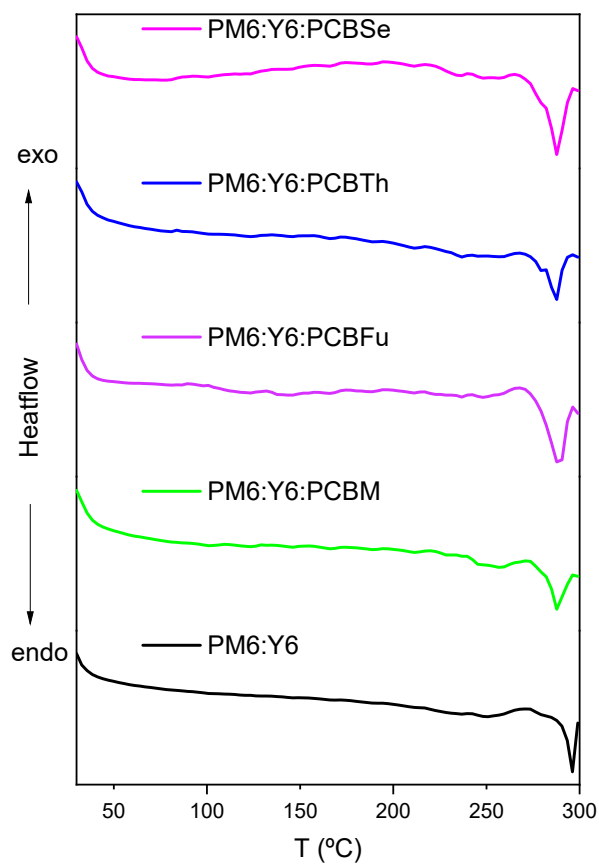

**Fig. S29** DSC thermograms of the blend films.

**Table S1.** Temperature of the transition and enthalpy associated for each of the blend films.

| Sample        | Temperature of the transition (°C) | Enthalpy (mJ) |
|---------------|------------------------------------|---------------|
| PM6:Y6        | 250.7                              | 9.7           |
|               | 296.3                              | 29.7          |
| PM6:Y6:PCBM   | 286.8                              | 15.3          |
| PCBM:Y6:PCBFu | 289.2                              | 33.9          |
| PM6:Y6:PCBTh  | 280.5                              | 1.1           |
|               | 287                                | 10.9          |
| PM6:Y6:PCBSe  | 287.8                              | 30.9          |

## References

- 1 K. Kim, C. Jo, S. Easwaramoorthi, J. Sung, D. H. Kim and D. G. Churchill, *Inorg. Chem.*, 2010, **49**, 4881–4894.
- 2 S. D'Alessandro, G. Alfano, L. Di Cerbo, S. Brogi, G. Chemi, N. Relitti, M. Brindisi, S. Lamponi, E. Novellino, G. Campiani, S. Gemma, N. Basilio, D. Taramelli, M. C. Baratto, R. Pogni and S. Butini, *Bioorg. Chem.*, 2019, **89**, 103020.
- 3 O. Fernandez-Delgado, E. Castro, C. R. Ganivet, K. Fosnacht, F. Liu, T. Mates, Y. Liu, X. Wu and L. Echegoyen, *ACS Appl. Mater. Interfaces*, 2019, **11**, 34408–34415.
